# Supplementary material for: In-house cellulase production from AFEX™ pretreated corn stover using Trichoderma reesei RUT C-30
Source: Royal Society of Chemistry journal article supplement (doi:10.1039/c3ra44847a), 2013-01-01

## Supplemental figure:

### **In-house Cellulase Production from AFEX<sup>TM</sup> Pretreated Corn Stover using *Trichoderma reesei* RUT C-30**

**Alan Culbertson,<sup>a</sup> Mingjie Jin,<sup>\*a,b</sup> Leonardo da Costa Sousa,<sup>a,b</sup> Bruce E. Dale<sup>a,b</sup> and Venkatesh Balan<sup>a,b</sup>**

<sup>a</sup>DOE Great Lakes Bioenergy Research Center, Michigan State University, East Lansing, MI 48824.

<sup>b</sup>Biomass Conversion Research Laboratory (BCRL), Department of Chemical Engineering and Materials Science, Michigan State University, MBI Building, 3900 Collins Road, Lansing, MI 48910.

\*Corresponding author: Fax: +1 517 336 4615, E-mail address: [jinmingj@egr.msu.edu](mailto:jinmingj@egr.msu.edu) (Jin, M)

Fig. S1 Enzymatic hydrolysis yields of AFEX-CS using in-house produced *T. reesei* enzymes. Here, (A): glucose yield, and (B): xylose yield after 72 h enzymatic hydrolysis. *T. reesei* enzymes were produced by fermentation in a 1 L flask with working volume of 200 ml. Fermentation medium contained 20 g/L AFEX-CS and 4 g/L CaCO<sub>3</sub> with and without addition of 0.5% (v/v) CSL. Enzymatic hydrolysis performance was investigated by varying the ratio of fermentation broth over total enzymatic hydrolysis reaction volume and by supplementation of Novozyme 188 and Ctec 2. Glucan loading used for enzymatic hydrolysis was 1% (w/w) glucan loading.

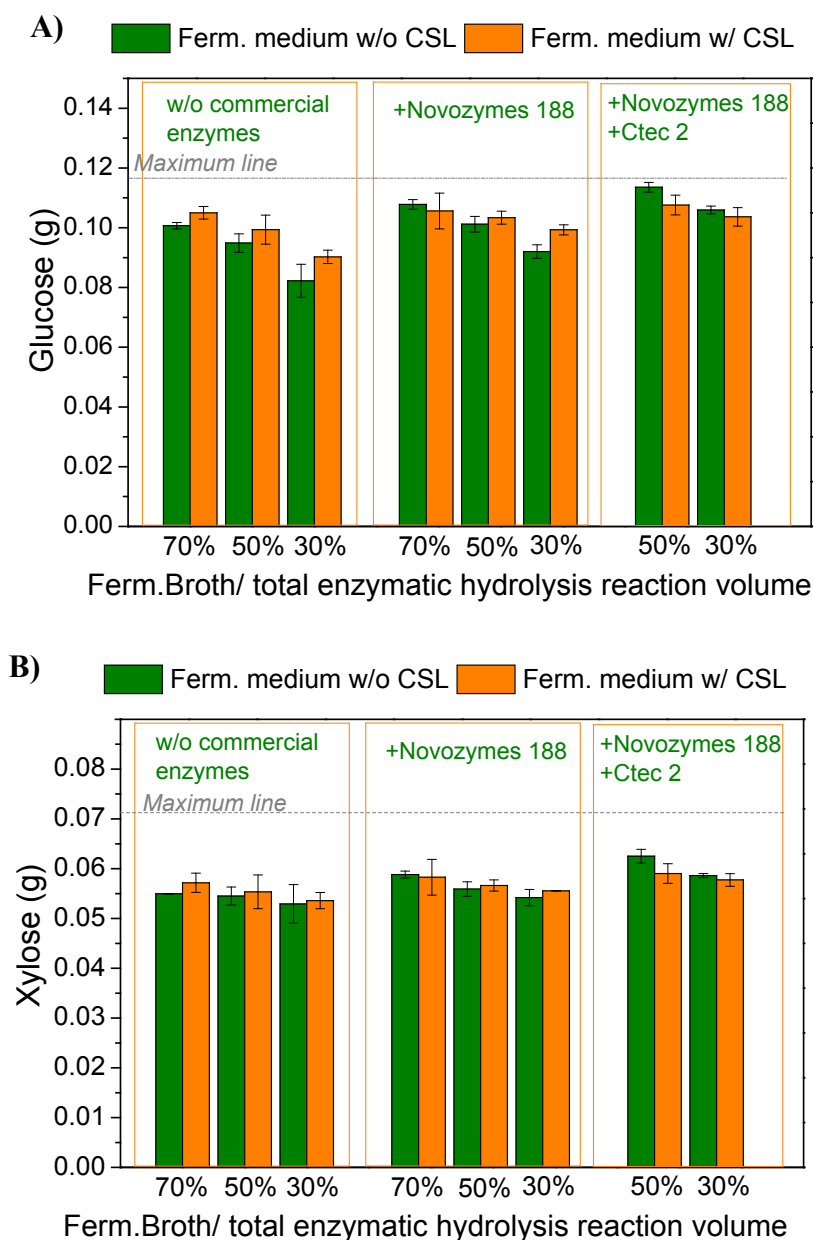

Supplement: c3ra44847a.pdf [file c3ra44847a.pdf]
